# Supplementary material
Source: publisher figshare collection journal article supplement (https://gsapubs.figshare.com/ndownloader/files/29062227)
Supplement: Supplementary file 1 [file 29062227]

Supplemental Material to:

Baichtal, J.F., Lesnek, A.J., Carlson, R.J., Schmuck, N.S., Smith, J.L., Landwehr, D.J., and Briner, J.P., 2021, Late Pleistocene and early Holocene sea-level history and glacial retreat interpreted from shell-bearing marine deposits of southeastern Alaska, USA: Geosphere, v. 17, <https://doi.org/10.1130/GES02359.1>.

**REFERENCES CITED**

Ackerman, R.E., T.D. Hamilton, and R. Stuckenrath, 1979, Early Culture Complexes on the Northern Northwest Coast. Canadian Journal of Archaeology, No. 3, pp.195-209.

Ackerman R.E., K.C. Reid, J.D. Gallison, and M.E. Roe, 1985, Archaeology of Heceta Island: A Survey of 16 Timber Harvest Units in the Tongass National Forest, Southeastern Alaska. Center for Northwest Anthropology Project Report Number 3, Washington State University, Pullman, Washington.

Addison, J.A., Beget, J.E., Ager, T.A., and Finney, B.P., 2010, Marine tephrochronology of the Mt. Edgecumbe Volcanic Field, Southeast Alaska, USA: Quaternary Research, v. 73, p. 277–292.

Alaska Paleontological Data Base. <http://www.alaskafossil.org/>. (accessed March 2021).

Barron, J.A., Bukry, D., Addison, J.A., and Ager, T.A., 2016, Holocene evolution of diatom and silicoflagellate paleoceanography in Slocum Arm, a fjord in southeastern Alaska: Marine Micropaleontology, v. 126, p.1-18.

Barron, J.A., Bukry, D., Dean, W.E., Addison, J.A., and Finney, B., 2009, Paleoceanography of the Gulf of Alaska during the past 15,000 years: Results from diatoms, silicoflagellates, and geochemistry: Marine micropaleontology, v. 72, p. 176–195.

Berg, H.C., 1973, Geology of Gravina Island, Alaska: A description of the stratigraphy, lithology, general geology, and mineral resources of a structurally complex 100-square island near Ketchikan, Alaska: US Geological Survey Bulletin 1373, United States Department of the Interior, p. 1-41.

Barrie, J. V. & K. W. Conway. 1999. Late Quaternary Glaciation and Postglacial Stratigraphy of the Northern Pacific Margin of Canada: Quaternary Research v. 51, Table 1, p. 119.

Barrie, J.V., Greene, H.G., Conway, K.W. and Brothers, D.S., 2021. Late Quaternary Sea level, isostatic response, and sediment dispersal along the Queen Charlotte Fault: Geosphere.v.17 (2), p. 375-388.

Bevill, R., Kelly, M., and Westwood, L. 2001, Heritage Resources Inventory of Selected Portions of the Kosciusko Island Timber Sale Project, Kosciusko Island, Southeastern Alaska. URS Corporation, Prepared for the USDA Forest Service, Tongass National Forest.

Buddington, A.F., and Chapin, T., 1929, Geology and Mineral Deposits of Southeastern Alaska: U.S. Geological Survey Bulletin, v. 800, p. 398.

Campbell, C.R., 1995, An Archaeological Survey of Big Salt Lake Road, Alaska Forest Highway 9, Prince of Wales Island, Southeast Alaska: Western Federal Land Highway Division Federal Highway Administration, DTFH70-94-Q-06.

Carlson, R.J., 1984, An analysis of Marine Shells from Yatuk Creek Rock Shelter and Unnamed Lake Marine Beach, Prince of Wales Island, Southeastern Alaska. Report submitted under Contract 53-0109-3-00152 to U.S. Department of Agriculture Forest Service, Ketchikan Area, Alaska, p. 1-14.

Carlson, R.J., 1991, Field notes on file United States Forest Service, Craig Ranger District, Craig, Alaska. USDA, Report 1991-05-35.

Carlson, R.J., 1992, Raised Marine Beach Inventory, Southeast Alaska: Unpublished Archaeological Files, U.S. Forest Service, Tongass National Forest, Ketchikan Area.

Carlson, Risa J., 1994, Archaeology and Paleontology In The Karst of Southeast Alaska: American Caves, Vol. 7, No. 1, Winter/Spring 1994 pp.14-16.

Carlson, R.J., 2007, Current Models for the Human Colonization of the Americas: The Evidence from Southeast Alaska [Master of Philosophy, World Archaeology]: University of Cambridge, Cambridge, England, 67 pp.

Chapin, T. 1918. The structure and stratigraphy of Gravina and Revillagigedo Islands, Alaska: U.S. Geological Survey Professional Paper 120-D, p 99.

Connor, C., Streveler, G., Post, A., Monteith, D., and Howell, W., 2009, The Neoglacial landscape and human history of Glacier Bay, Glacier Bay National Park and Preserve, southeast Alaska, USA: The Holocene, v. 19, no. 3, p. 381-393.

Davis, S.D., Swanson-Iwamoto, K., Lively, R.A., and Bair, G.A., 1991, Survey Design for the Cultural Resource Inventory for the ’91 Kelp Bay Timber Sale, Baranof Island, Alaska: USDA Forest Service, Tongass National Forest, Sitka, Alaska.

Dixon, J.E. and Monteleone, K., 2014. Gateway to the Americas: Underwater archeological survey in Beringia and the North Pacific. In Prehistoric archaeology on the continental shelf (pp. 95-114). Springer, New York, NY.

Edmondson, P., Foster, K, and Foskin, D., 1993, Archaeological Clearance Report for Central Prince of Wales EIS (VCU 552), Tongass National Forest, Ketchikan Area, Southeast, Alaska. USDA Forest Service ReportNumber 1993-05-1-07. May 15, 1993.

Edmondson, P., Foster, K, Foskin, D., and Monteith, D., 1993, Archaeological National Forest, Ketchikan Area, Southeast, Alaska. USDA Forest Service Report Number 1993-05-1-08. June 25, 1993.

Gastineau Channel Formation, Southeast Alaska Geology, <https://www.southeastalaskageology.com/gastineauformation> (accessed March 2021).

Greiser, T. W., 1993, Lab Bay Report: Cultural Resource Survey Specialist Report prepared by Historical Research Associates, Inc. for Harza Northwest, Inc. for USDA Forest Service, Tongass National Forest, Ketchikan Area.

Goodwin, R.G., 1988, Holocene Glaciolacustrine Sedimentation in Muir Inlet and Ice Advance in Glacier Bay, Alaska. Arctic and Alpine Research, v. 20 (1). p. 55-69

Hastings, K., 2005, Long-term persistence of isolated fish populations in the Alexander Archipelago [Doctor of Philosophy]: University of Montana, Graduate Student Theses, Dissertations, & Professional Papers. 9560. <https://scholarworks.umt.edu/etd/9560>

Heaton, T. H. 2001. Whale remains from Puffin Grotto, a raised sea cave on Noyes Island, Southeast Alaska: South Dakota Academy of Science Proceedings, v. 80, p. 409.

[Heaton, T. H., Grady, F. 2003a](http://www.usd.edu/esci/alaska/pubs/IACF2003.pdf). The Late Wisconsin vertebrate history of Prince of Wales Island, Southeast Alaska. In Schubert, B. W., Mead, J. I., and Graham, R. W. editors, Ice Age Cave Faunas of North America, Indiana University Press, Chapter 2, p. 17-53.

Hetherington, R., Barrie, J.V., Reid, R.G.B., MacLeod, R., Smith, D.J. James, T.S., and Kung, R., 2003, Late Pleistocene coastal paleogeography of the Queen Charlotte Islands, British Columbia Canada, and its implications for terrestrial biogeography and early postglacial human occupation: Canadian Journal of Earth Sciences, v. 40, p. 1755-1766.

Holmes, C.E., Dale, R.J., and McMahan, J. D., 1989, Archaeological Mitigation of the Thorne River Site (CRG-177), Prince of Wales Island, Alaska. Forest Highway No. 42, (DT-FH70-86-00003), Office of History and Archaeology Report Number 15, Division of Park and Outdoor Recreation, Alaska Department of Natural Resources, Anchorage.

Holloway, R.G., 1988, Holocene Paleoecology of the Southern Alexander Archipelago, Alaska. Contribution Number 013, Laboratory of Quaternary Studies, Department of Anthropology, LECAPSR, Eastern New Mexico University, Portales, New Mexico, pp. 1-10.

Heusser, C. J. 1960. Late-Pleistocene Environments of North Pacific North America: An Elaboration of Late-Glacial and Postglacial Climatic, Physiographic, and Biotic Changes: American Geographical Society, Special Publication No. 35: p. 104 and p. 224.

Lemke, R.W., and Yehle, L.A., 1972a, Reconnaissance engineering geology of the Haines area, Alaska, with emphasis on evaluation of earthquake and other geologic hazards: U.S. Geological Survey Open-File Report 72-229, 109 p., 2 sheets, scale 1:24,000.

Lemke, R.W., 1974, Reconnaissance engineering geology of the Wrangell area, Alaska, with emphasis on evaluation of earthquake and other geologic hazards: U.S. Geological Survey Open-File Report 74-1062, 103 p., 1 sheet, scale 1:7,200.

Lemke, R.W., 1975, Reconnaissance engineering geology of the Ketchikan area, Alaska, with emphasis on evaluation of earthquake and other geologic hazards: U.S. Geological Survey Open-File Report 75-250, 65 p., 1 sheet, scale 1:63,360.

Lesnek, A.J., Briner, J.P., Baichtal, J.F., and Lyles, A.S., 2020. New constraints on the last deglaciation of the Cordilleran Ice Sheet in coastal Southeast Alaska: Quaternary Research, v. 96, p.140-160.

Loney, R.A., 1964. Stratigraphy and Petrography of the Pybus-Gambier Area, Admiralty Island, Alaska: U.S. Geological Survey Bulletin, v. 1178. p. 88, 94, and 98.

McConnell, R.G. 1913. Portions of Portland Canal and Skeena mining divisions, Skeena district, British Columbia: Canada Geology Survey Mem. 32. p. 22

McKenzie, G. D. & R. P. Goldthwaite. 1971. Glacial History of the Last Eleven Thousand Years in Adams Inlet, Southeastern Alaska: Geologic Society of America Bulletin, v. 82, p. 1767-1782.

Mann, D.H. and Streveler, G.P., 2008, Post-glacial relative sea level, isostasy, and glacial history in Icy Strait, Southeast Alaska, USA: Quaternary Research, v. 69, no. 2, p. 201-216.

Marcher, M.V., 1971, Raised beach deposits and their ground-water potential in the southern part of the Metlakatla Peninsula, Annette Island, Alaska, in U.S. Geological Survey, Geological survey research 1971, Chapter D: U.S. Geological Survey Professional Paper 750-D, p. D202-D205.

Miller, R.D., 1972, Surficial geology of the Juneau urban area and vicinity, Alaska, with emphasis on earthquake and other geologic hazards: U.S. Geological Survey Open-File Report 72-255, 108 p., 7 sheets, scale 1:24,000.

Miller, R.D., 1973a, Two diamictons in a landslide scarp on Admiralty Island, Alaska, and the tectonic insignificance of an intervening peat bed: Journal of Research of the US Geological Survey, v. 1, no. 3, p. 309-314.

Miller, R.D., 1973b, Gastineau Channel Formation, a composite glaciomarine deposit near Juneau, Alaska: U.S. Geological Survey Bulletin 1394-C, p. C1-C20.

Miller, R.D., 1975, Surficial geologic map of the Juneau urban area and vicinity, Alaska: U.S. Geological Survey Miscellaneous Investigations Series Map 885, 1 sheet, scale 1:48,000.

Mobley, Charles M., 1988, Holocene Sea Levels in Southeast Alaska: Preliminary Results: Arctic, v. 41, no. 4, p. 261-266.

Moss, M.L. and Erlandson, J.M., 1996, A terminal Pleistocene Paleoshoreline Feature on Admiralty Island, Southeast Alaska: Current Research in the Pleistocene, v. 13, p. 123-125.

Moss, M.L. and Erlandson, J.M., 1999, The Sea Caves of Southeast Alaska: Archaeology at Oregon, Vol. 2, No. 1, Winter 1999. p. 6-9.

Moss, M.L. and Erlandson, J.M., 2000, Wolf’s Lair: Middle and Late Holocene Wooden Artifacts from a Sea Cave on Baker Island, Alaska: Canadian Journal of Archaeology, v.24, p. 107-128.

Putman, D. E., Fifield T. E., 1995. Estuarine Archaeology and Holocene Sea level Change on Prince of Wales Island, Alaska: Alaska Anthropological Association, Anchorage, 22 nd Annual Meeting, April 1995, Abstracts, p. 19, Unpublished Manuscript, 35 pp. with figures.

Ream, B. A., & B. M. Seleby, 1987, The Archaeology of North Prince of Wales Island: A Survey of 19 Timber Harvest Units in the Tongass National Forest, Southeast Alaska. Report to the USDA Forest Service, Alaska Region, Ketchikan Area, Tongass National Forest. Under contract # 53-01-09-6-00214. p. 169.

Sainsbury, C.L. 1961, Geology of Part of the Craig C-2 Quadrangle and Adjoining Areas, Prince of Wales Island, Southeastern Alaska: The general and economic geology of an area 35 miles northwest of Ketchikan. Mineral Resources of Alaska: Geological Survey Bulletin 1058-H, United States Department of the Interior, p. 299-362.

Schmuck, N.S., 2021 Contextualizing the Development of Coastal Adaptations in Postglacial Southeast Alaska [PhD Dissertation]: University of Alaska Fairbanks. 233 p.

Schmuck, N., Reuther, J., Baichtal, J.F. and Carlson, R.J., 2021. Quantifying marine reservoir effect variability along the Northwest Coast of North America. Quaternary Research, pp.1-22.

Schofield, S.J. and G. Hansen, 1922, Geology and ore deposits of the Salmon River district, British Columbia: Canada Geological Survey Mem. 182. pp. 27-28

Shannon & Wilson, Inc. 2004. Geotechnical Data Report, Sandy Beach Road Improvement Project, Thorne Bay, Alaska. Submitted to USDA Forest Service, Juneau, Alaska Project Number: 32-1-01529-003.

Shugar, D.H., Walker, I.J., Lian, O.B., Eamer, J.B., Neudorf, C., McLaren, D., and Fedje, D., 2014, Post-glacial sea level change along the Pacific coast of North America: Quaternary Science Reviews, v. 97, p. 170-192.

Smith, J.L., Carlson, R.J., and Baichtal, J.F., 2016, Cultural Resource Investigations in the Whale Pass to El Capitan Road Improvement Project Area, Prince of Wales Island, Alaska: Addendum. Project No. R2014100554001. Prepared for the Federal Highway Administration, Vancouver, Washington and the USDA Forest Service. 136 p.

Squier Associates, 2001, Geotechnical Report 25-01, Coffman Cove Road, Phase 2, AK PFH 44-1(2), Preliminary Geotechnical Investigations, Prince of Wales Island, Alaska, Stations 14+700 to 26+700. Prepared for the Federal Highway Administration, Vancouver, Washington. 5 pp. with appendices.

Stuckenrath, R., 1971, Report of Archaeological and Paleoclimatological Survey, 1971, Vicinity of Ketchikan. Report on file, Radiocarbon Laboratory, Smithsonian Institution, Washington, D.C. 9. p.

Swanston, D.N., 1964, A Late-Pleistocene Glacial Sequence from Prince of Wales, Alaska: Arctic, v. 22, no. 1, p. 25-33.

Tobin, E. F. 1969. Six for Wilson Lake: Alaska Sportsman: May, p. 32-34 and 51-53.

Twenhofel, W.S., 1952, Recent shore-line changes along the Pacific coast of Alaska: American Journal of Science, v. 250, no. 7, p. 523-548.

Viens, R.J., 2001, Late Holocene climate change and calving glacier fluctuations along the southwestern margin of the Stikine Icefield, Alaska: University of Washington, Seattle, [PhD Dissertation]:160 p., illust.

Wanek, A.A., and Callahan, J.E., 1971, Geologic reconnaissance of a proposed powersite at Lake Grace, Revillagigedo Island, southeastern Alaska: U.S. Geological Survey Bulletin 1211-E, p. E1-E24, 1 sheet.

Yehle, L.A., and Lemke, R.W., 1972, Reconnaissance engineering geology of the Skagway area, Alaska, with emphasis on evaluation of earthquake and other geologic hazards: U.S. Geological Survey Open-File Report 72-454, 108 p., 4 sheets, scale 1:96,000.

Yehle, L.A., 1974, Reconnaissance engineering geology of Sitka and vicinity, Alaska, with emphasis on evaluation of earthquake and other geologic hazards: U.S. Geological Survey Open-File Report 74-53, 104 p., 3 sheets.

Yehle, L.A., 1978, Reconnaissance engineering geology of the Petersburg area, southeastern Alaska, with emphasis on geologic hazards: U.S. Geological Survey Open-File Report 78-675, 92 p., 2 sheets.

Yehle, L.A., 1979, Reconnaissance engineering geology of the Yakutat area, Alaska, with emphasis on evaluation of earthquake and other geologic hazards: U.S. Geological Survey Professional Paper 1074, 44 p., 1 sheet, scale 1:63,360.
